# Supplementary material for: The effect of human amnion epithelial cells on lung development and inflammation in preterm lambs exposed to antenatal inflammation
Source: PubMed Central journal article supplement (PMC8232434; doi:10.1371/journal.pone.0253456), 2021-06-25

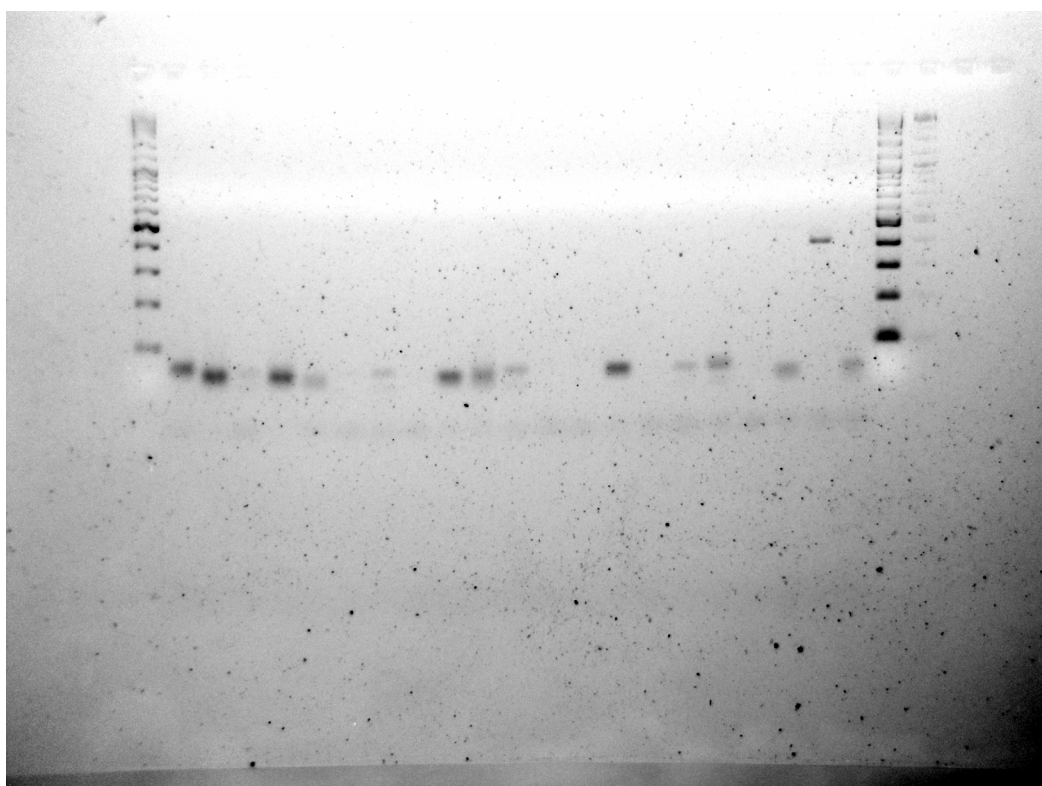

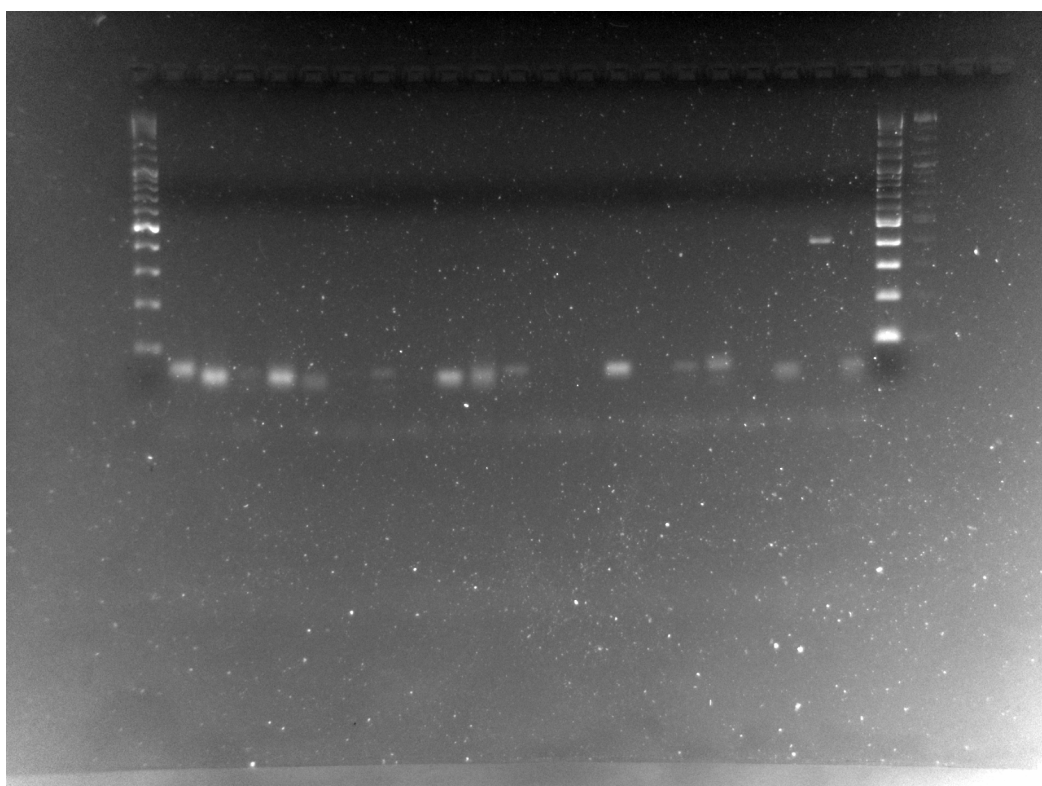

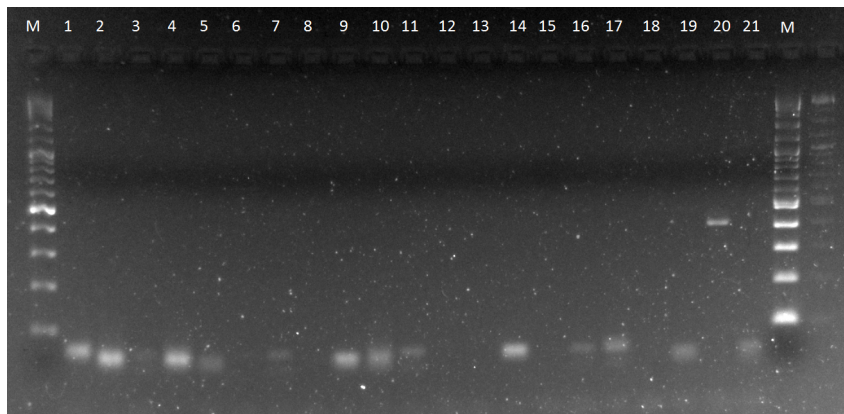

Supplement: pone.0253456.s008.pdf [file pone.0253456.s008.pdf]
